# Supplementary material
Source: PubMed Central journal article supplement (PMC8758535)
Supplement: NIHMS1757168-supplement-1.pdf [file NIHMS1757168-supplement-1.pdf]

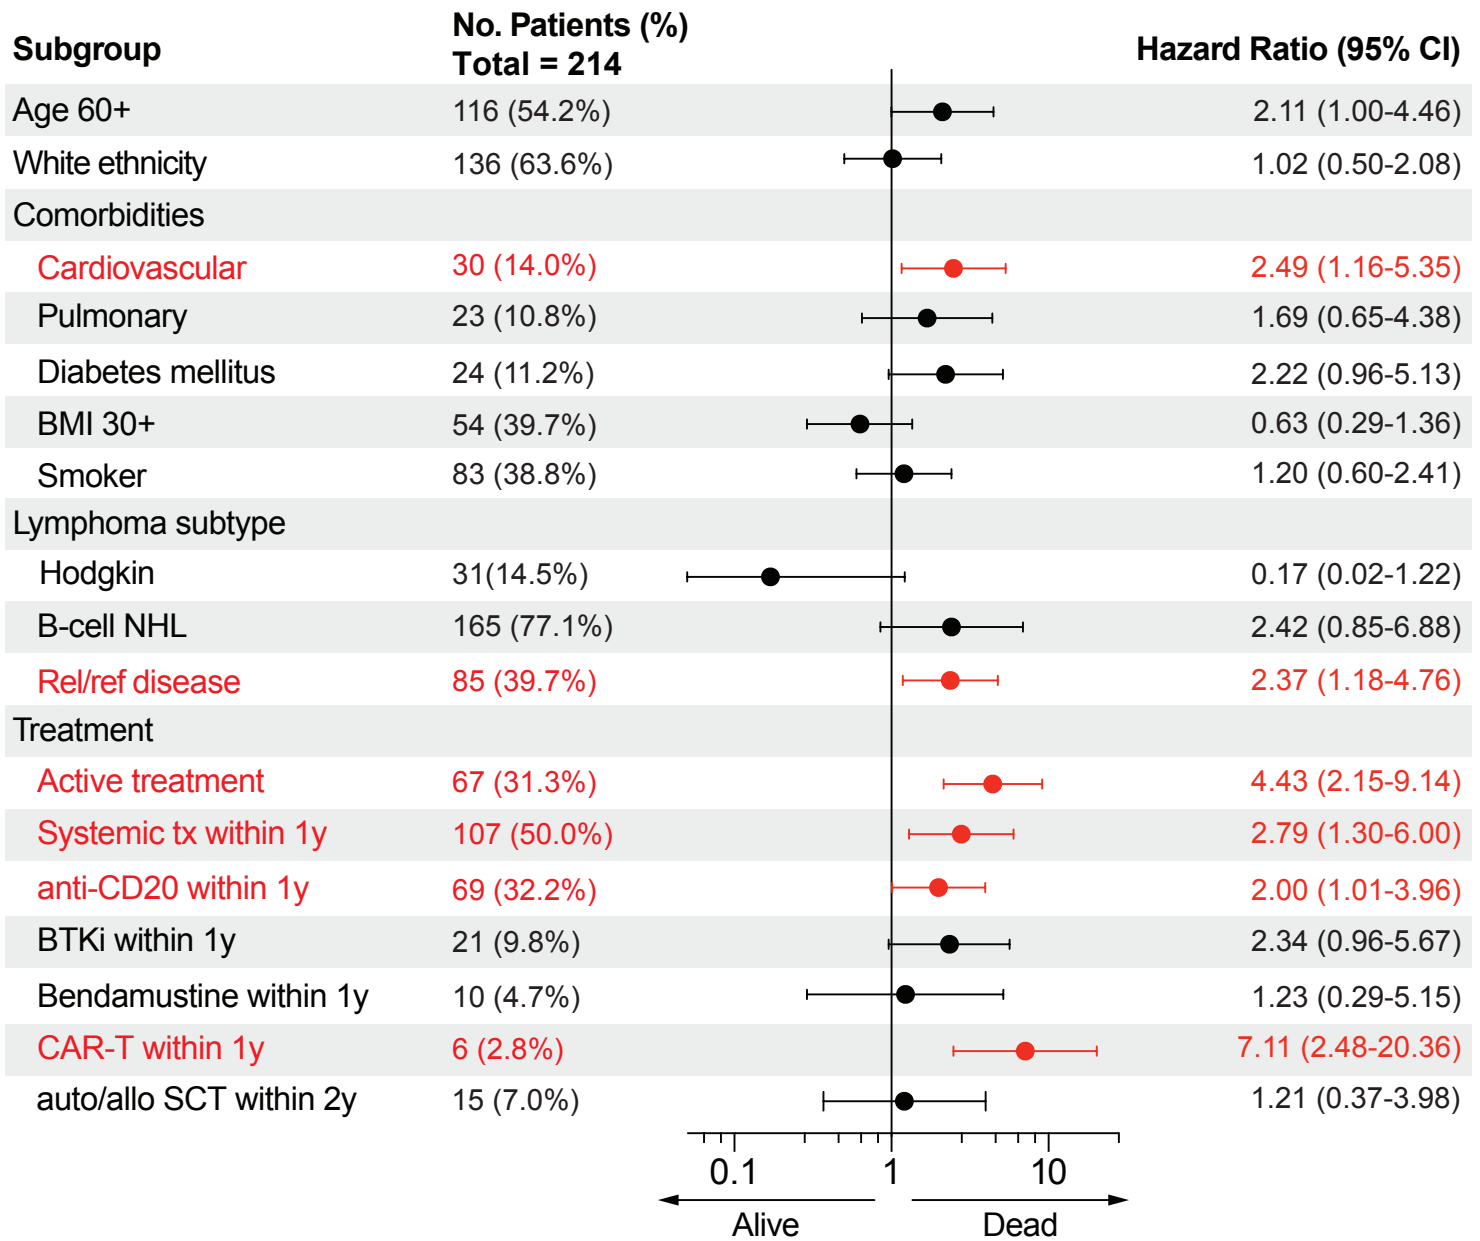

**Supplementary Figure 1**

**Supplementary Figure 1. Clinical predictors of mortality in lymphoma patients with acute COVID-19 infection.** Univariate analysis of clinical risk factors predicting mortality attributable to COVID-19 infection in patients with lymphoma. Statistically significant risk factors highlighted in red.
