# Supplementary material
Source: PubMed Central journal article supplement (PMC8758535)
Supplement: NIHMS1757168-supplement-2.pdf [file NIHMS1757168-supplement-2.pdf]

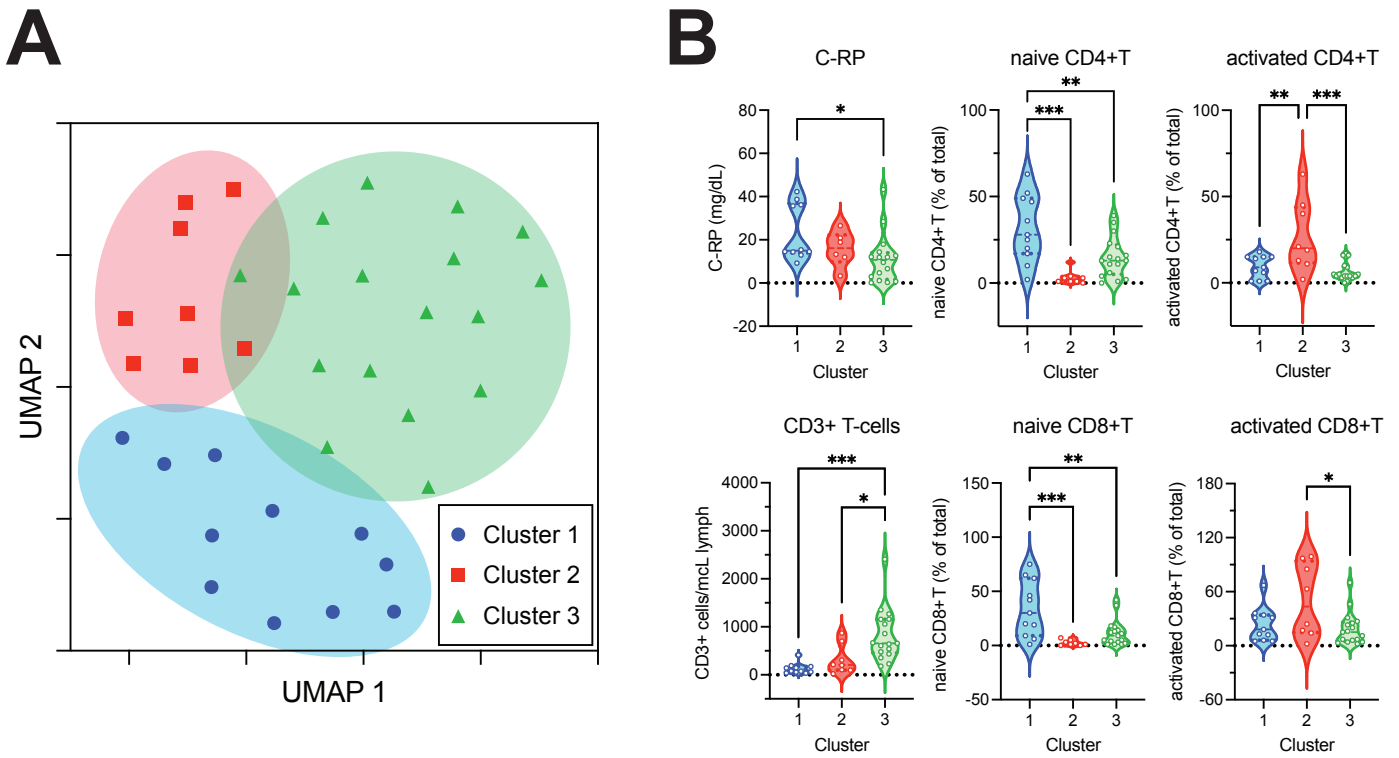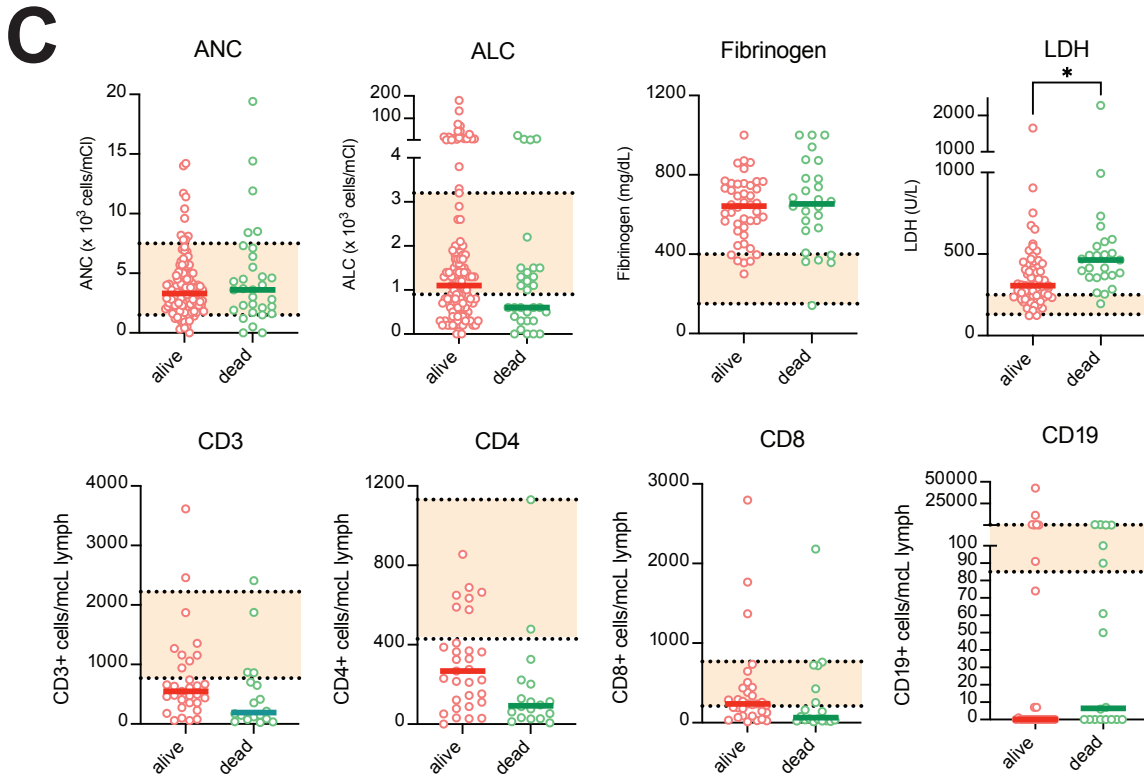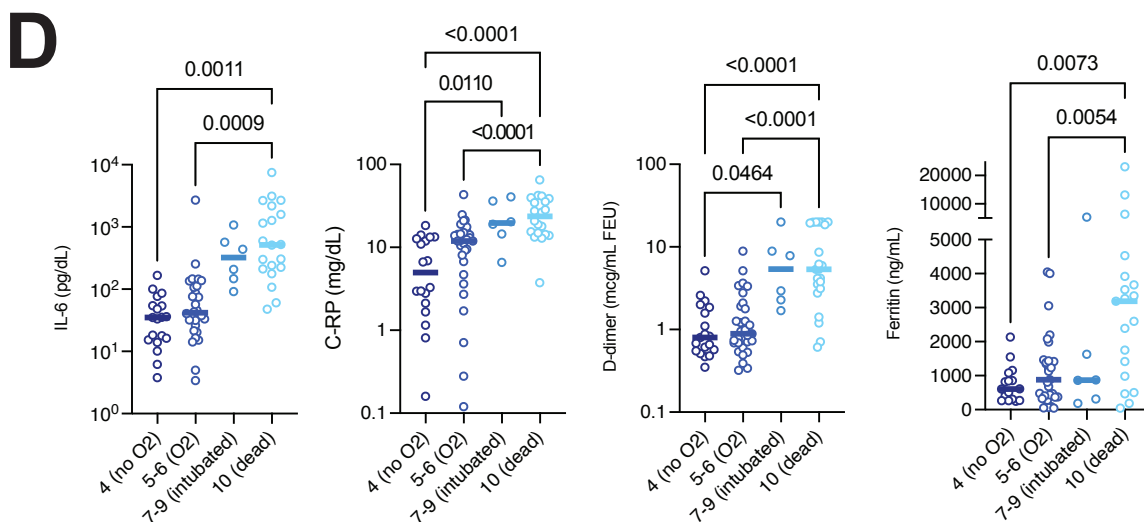

Supplementary Figure 2

**Supplementary Figure 2. Distinct immunological patterns in lymphoma patients with COVID-19 infection.** a) UMAP projection of 36 patients with lymphoma in whom at least 10% of all laboratory analyses were conducted. Clusters identified based on Earth Mover's Distance (EMD) of each patient relative to each other in UMAP space is shown. b) Differences in immunologic parameters between three EMD clusters shown in a). c) Laboratory markers in patients who were alive or dead following acute COVID-19 infection. d) Association of laboratory markers with WHO COVID-19 Severity Scale. \* $p < 0.05$ . \*\* $p < 0.01$ . \*\*\* $p < 0.001$ .
